# Supplementary material for: SOAPindel: Efficient identification of indels from short paired reads
Source: HighWire-hosted journal article supplement (doi:10.1101/gr.132480.111), 2012-09-12
Supplement: Supp_Material.docx [file Supp_Material.docx]

SUPPLEMENT

SOAPindel: Efficient identification of indels from short paired reads

Shengting Li1,2, Ruiqiang Li1#, Heng Li3, Jianliang Lu1, Yingrui Li1, Lars Bolund1,4, Mikkel H. Schierup2*, Jun Wang1,5,6*

1. BGI Shenzhen, Shenzhen 518000, China

2. Bioinformatics Research Centre, Aarhus University, DK 8000 Aarhus C., Denmark

3. Human Genetics, Aarhus University, DK 8000 Aarhus C, Denmark

4. Broad Institute, 7 Cambridge Center, MA 02142, USA

5. The Novo Nordisk Foundation Center for Basic Metabolic Research, University of Copenhagen.

6. Department of Biology, University of Copenhagen, Copenhagen, Denmark.

# Present address: Biodynamic Optical Imaging Center, and College of Life Sciences, Peking University, Beijing 100871, China

* Corresponding authors: [wangj@genomics.cn](mailto:wangj@genomics.cn), [mheide@birc.au.dk](mailto:mheide@birc.au.dk)

**Index**

1. Local assembly algorithm 3

2. Local alignment algorithm 4

3. Quality values distribution 5

4. FP/FN of Insertion vs. Deletion (Venter-hg19 alignment) 6

5. Effects of low complexity & neighboring variations 7

6. Homozygote & Heterozygote of Fixed Length Simulation 9

7. Indels confirmed by Chimp-Human alignment 10

8. Fixed indel sizes running time 11

9. Details of 30 validated indels on ENm010 & ENm013 of NA18507 12

## Local assembly algorithm

Figure S1

Assembly procedures:

1. Build up the de Bruijn graph with detailed information. Figure S1 shows the K-mer node structure.
2. After unifying and linearizing the K-mers between the reference sequence and the sample reads, we collect a subset of K-mers (nails) that could be used to guide the assembly.
3. Initialize the contig from the first nail with the structure showed in the figure above. Then push this contig in a queue for breadth-first process.
4. Shift a contig from the queue.
   1. If this contig is finished, i.e. the last K-mer is also the last nail, then we just output this contig.
   2. If something wrong happened, e.g. the last K-mer is located in a long tandem repeat; the current nail locates in wrong order or wrong distance, we just drop it or output part of this contig.
   3. Otherwise we extend the contig for one bp from its followed K-mer links. For each link, we build a new contig structure, which inherits most of the information from the old one and expands with new attributes. We sort these new contigs by the effective reads coverage of last K-mer and other priority properties. Then we push them into the queue for future process.
5. Repeat d) until the queue is empty or we get enough contigs. Because we are exhausting all paths, and as mentioned in the paper, every heterozygote variation will double the results number. So we could stop if we already find most of the valuable paths (they are always come out first in our method).

## Local alignment algorithm

1. First, for each contig that need to align to the reference sequence, we find out the common unique k-mers set between it and the corresponding reference sequence.
2. Within this k-mers set, we pickup the maximum collinear subset. If there are too many unique k-mers are not in the subset, there should be some mis-assembly and we cut the contig into pieces according to the collinear subset and handle them separately.
3. For each collinear k-mers subset, we lookup the adjacent k-mer pairs one by one. If the distance of them on the reference equal to it on the contig, we move on to next pair until some difference happens. There should be some indel happens within the last k-mer pair, and then we perform the Smith-Waterman alignment here to find out any indels.

## Quality values distribution

Figure S2: FP/FN distribution of different quality scores for the simulation data from Venter vs. hg19.

## FP/FN of Insertion vs. Deletion (Venter-hg19 alignment)

Figure S3: Similar with Figure2 in main paper but showed as Deletion and Insertion, separately. Comparison of SOAPindel, Dindel, Pindel and GATK on data simulated based on hg19. Read length is 100bp and coverage is 20X, variations come from the observed differences of Venter-hg19 alignments. False negative rates of deletion are shown as histogram of number of indels (a: left y axis) and log ratio lines (a: right y axis), and as lines of percentage (b). False positive rates of deletion are illustrated in same way (c, d). FN & FP rates of insertion are shown in (e, f, g, h)

## Effects of low complexity & neighboring variations

Even for SOAPindel, FN and FP for long indels are very high and prohibitive for accurate analyses of real genomes. Two properties of the sequence around indels strongly affect the sensitivity and specificity (Figure S3):

1. Low complexity sequence

The presence of repeats lower the sequence complexity and make assembly harder to perform. Several kinds of low complexity sequence are often present around indels, e.g.:

- 1. Tandem repeats. E.g. ATATATATATATATATATATATATATAT
  2. Joined tandem repeats. E.g. AAAAAAAAAAAAAACGCGCGCGCGCGCG
  3. Part of the repeat pattern occurs multiple times. E.g. CTTCTTTTCTCTTCTTTCTTTTTCTTTT
  4. Long tracts (>30bp) of repeats.

Low complexity causes high false negative rates for long indels (Figure S3a).

1. High local variations density (neighboring variations)

An indel is difficult to detect when SNPs or indels surround it. The de novo assembly as well as the alignment can choose incorrect paths resulting in an increase of both FN and FP.

1. Neighboring SNPs or indels increases FN for short indels in particular (Figure S3b).
2. High local variations density also increases the FP significantly (Figure S3c). The neighboring SNPs or indels not just simply make a real indel undetected. Sometimes they also “generate” a false indel by interfering with the assembly.
   This implies that part of the FP rate reported in Figure 2 is due to inference of a wrong size of indels in complex regions.

Figure S4: a) The red line shows the FN of indels that have less than 90% low complexity sequence. The green line shows the FN for the rest of the indels. b) The red line shows the FN of indels who have no SNPs or indels within 30bps. The green line shows the FN for the rest of the indels. c) The red line shows the FP of indels when we ignore the predicted indels that overlap with real SNPs or real indels that do not have similar size or type.

## Homozygote & Heterozygote of Fixed Length Simulation

Figure S5: Similar with Figure3 in main paper but the Y-axis is split by homozygote and heterozygote rather than deletion and insertion. The effect of coverage and reads length on the false negative and false positive rates of SOAPindel, Dindel, Pindel and GATK on simulated data based on hg19, chromosome 22. (a, b) FN and FP percentage for read length of 100bp and coverage of 5/10/20/40/80X, with fixed indel sizes of 1/3/5/10/30/50/100. Every column is split into two parts: % of heterozygote (up) and % of homozygote (down). (c, d) FN and FP percentage for read lengths of 50/75/100/125bp and coverage of 20X, with the same fixed indel sizes and also split into heterozygote and homozygote.

## Indels confirmed by Chimp-Human alignment

Figure S6: The confirmed percentage and indel size distribution of indels that was detected by SOAPindel and confirmed by Chimp-Human alignments. Smoothed by window-size=5.

## Fixed indel sizes running time

Figure S7: Time used on pure simulation data of different indel sizes and coverages.

## Details of 30 validated indels on ENm010 & ENm013 of NA18507

| **Con-firmed** | **Chr** | **Type** | **Len** | **Pos Start** | **Pos End** | **Allele** | **Coverage** | | **Het/Ref** |
| --- | --- | --- | --- | --- | --- | --- | --- | --- | --- |
| OK | chr7 | del | 32 | 26753014 | 26753014 | caatgggctttcaataaatatttgctggatga | 15 | 15 | 1.5 |
| OK | chr7 | del | 10 | 26835952 | 26835962 | tgacactaat | 15 | 7 | 0.83 |
| OK | chr7 | del | 9 | 26860063 | 26860066 | ATTATCTAC | 11 | 9 | 0.91 |
| OK | chr7 | ins | 8 | 26860346 | 26860348 | ATTGACTC | 30.8 | 28 | 2.56 |
| OK | chr7 | del | 29 | 27145152 | 27145161 | TGAGGTGCGCCATATTTTGGCGCAGAGGT | 15 | 11 | 1.36 |
| OK | chr7 | del | 8 | 27152399 | 27152400 | ACAAAATT | 15 | 15 | 0.68 |
| OK | chr7 | del | 38 | 89697792 | 89697798 | tatatatatatatatatatatatatatatatatatata | 9 | 6 | Hom |
| OK | chr7 | ins | 6 | 90020584 | 90020587 | ACTATA | 9.12 | 9 | 0.48 |
| OK | chr7 | ins | 8 | 90117635 | 90117636 | CAGAAACT | 19 | 16 | Hom |
| OK | chr7 | ins | 8 | 90117635 | 90117636 | CAGAAGCT | 17.3 | 14 | Hom |
| OK | chr7 | del | 11 | 90292416 | 90292416 | acacacacaca | 13 | 13 | Hom |
| OK | chr7 | del | 13 | 90292416 | 90292416 | acacacacacaca | 9 | 9 | Hom |
| OK | chr7 | del | 9 | 90314964 | 90314981 | ttttttttt | 10 | 1 | Hom |
| OK | chr7 | del | 18 | 90418251 | 90418253 | ggcaggggagctctattt | 21 | 21 | 1.5 |
| OK | chr7 | ins | 93 | 26900470 | 26900478 | AATGTGTGAAGATAATCAGTATGTTTAGGGGACATTGATTATCAATGTGAAGATAATCAATGTCCCCTAAACATACTGATTATCTTCACACAT | 29.4 | 23 | 3.67 |
| OK | chr7 | ins | 21 | 27189756 | 27189760 | TCATGTTGGCAGCTGACCAAT | 21.56 | 18 | Hom |
| OK | chr7 | ins | 6 | 89616334 | 89616339 | TAATAA | 25 | 21 | Hom |
| OK | chr7 | ins | 10 | 89617656 | 89617658 | CTTTGCTAGC | 38.33 | 30 | Hom |
| OK | chr7 | del | 6 | 89633988 | 89633995 | ATTAAA | 25 | 21 | Hom |
| OK | chr7 | del | 7 | 89679703 | 89679708 | tttttat | 32 | 31 | Hom |
| OK | chr7 | ins | 8 | 89760815 | 89760817 | GCCTCACA | 6.1 | 5 | Hom |
| OK | chr7 | del | 9 | 89847033 | 89847034 | aaaaaaaac | 10 | 10 | Hom |
| OK | chr7 | del | 20 | 89933958 | 89933983 | tagatagatagatagataga | 18 | 2 | Hom |
| OK | chr7 | ins | 9 | 90214973 | 90214986 | TTTTCTTTT | 10.63 | 8 | Hom |
| OK | chr7 | del | 8 | 90314964 | 90314982 | tttttttt | 11 | 2 | Hom |
| OK | chr7 | del | 6 | 90448202 | 90448219 | tgtgtg | 19 | 13 | Hom |
| FP | chr7 | ins | 11 | 26953580 | 26953593 | AAAAAAAAAAA | 5.3 | 5 | 0.88 |
| FP | chr7 | ins | 7 | 27226797 | 27226803 | CCCCCCC | 4.77 | 4 | 0.25 |
| FP | chr7 | del | 8 | 90362243 | 90362246 | tgttaggg | 3 | 3 | 0.15 |
| FP | chr7 | del | 11 | 90453973 | 90453981 | tccttaaaata | 6 | 2 | 0.22 |
|  |  |  |  |  |  |  |  |  |  |
